# Supplementary material for: Coralloid carbon material based on biomass as a promising anode material for lithium and sodium storage
Source: Royal Society of Chemistry journal article supplement (doi:10.1039/d0nj01769h), 2021-01-01
Supplement: d0nj01769h3.pdf [file d0nj01769h3.pdf]

| <b>Samples</b> | <b>Yield</b> | <b>SSA<sup>a</sup></b>             | <b>Vt<sup>b</sup></b>                | <b>Vm<sup>c</sup></b>                | <b>d<sub>002</sub><sup>d</sup></b> | <b>I<sub>D</sub>/I<sub>G</sub><sup>e</sup></b> |
|----------------|--------------|------------------------------------|--------------------------------------|--------------------------------------|------------------------------------|------------------------------------------------|
|                | <b>%</b>     | <b>m<sup>2</sup>g<sup>-1</sup></b> | <b>cm<sup>-3</sup>g<sup>-1</sup></b> | <b>cm<sup>-3</sup>g<sup>-1</sup></b> | <b>nm</b>                          |                                                |
| CMPC-3         | 21.5         | 900.1                              | 1.242                                | 0.675                                | 0.349                              | 1.233                                          |
| CMPC-2         | 22.7         | 903.0                              | 1.090                                | 0.343                                | 0.354                              | 1.28                                           |
| CMPC-1         | 19.2         | 908.4                              | 1.026                                | 0.412                                | 0.356                              | 1.18                                           |
| MPC            | 14.1         | 39.8                               | 0.081                                | 0.013                                | -                                  | 0.87                                           |

| <b>Samples</b> | <b>Yield</b> | <b>SSA<sup>a</sup></b>             | <b>Vt<sup>b</sup></b>                | <b>Vm<sup>c</sup></b>                | <b>d<sub>002</sub><sup>d</sup></b> | <b>I<sub>D</sub>/I<sub>G</sub><sup>e</sup></b> |
|----------------|--------------|------------------------------------|--------------------------------------|--------------------------------------|------------------------------------|------------------------------------------------|
|                | <b>%</b>     | <b>m<sup>2</sup>g<sup>-1</sup></b> | <b>cm<sup>-3</sup>g<sup>-1</sup></b> | <b>cm<sup>-3</sup>g<sup>-1</sup></b> | <b>nm</b>                          |                                                |
| CMPC-3         | 21.5         | 900.1                              | 1.242                                | 0.675                                | 0.349                              | 1.233                                          |
| CMPC-2         | 22.7         | 903.0                              | 1.090                                | 0.343                                | 0.354                              | 1.28                                           |
| CMPC-1         | 19.2         | 908.4                              | 1.026                                | 0.412                                | 0.356                              | 1.18                                           |
| MPC            | 14.1         | 39.8                               | 0.081                                | 0.013                                | -                                  | 0.87                                           |
