# Supplementary material for: Coralloid carbon material based on biomass as a promising anode material for lithium and sodium storage
Source: Royal Society of Chemistry journal article supplement (doi:10.1039/d0nj01769h), 2021-01-01
Supplement: d0nj01769h4.pdf [file d0nj01769h4.pdf]

# **The coralloid-carbon material based on biomass as promising anode material for lithium and sodium storage**

Ziqiang Yu<sup>\*a</sup>, Zhiqiang Zhao<sup>b</sup>, Tingyue Peng<sup>c</sup>

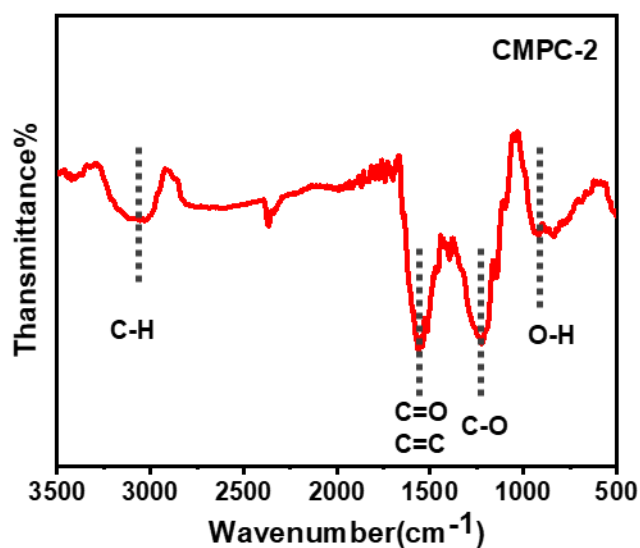

Figure S1. FT-IR spectra of CMPC-2.

The functional group of generated CMPC-2 is analyzed via the Fourier infrared spectrometer (FI-IR) as shown in Fig. S1. The absorption peak of CMPC-2 at the 900  $\text{cm}^{-1}$  deemed as the O-H groups bending vibrations, at the range of 1100-1310  $\text{cm}^{-1}$  is assigned as the C-O stretching vibration, for another, at 1500-1650  $\text{cm}^{-1}$  is identified as the C=O vibration of the carboxyl group or the stretching vibration of the aromatic ring structure C=C. the rich O-based functional groups in CMPC-2 enhance the conductivity of electrode materials<sup>39-40</sup>. As the above, during the activation and carbonization treatment, the CMPC-2 goes through the process of dehydration, polymerization, and aromatization.

Table S1. Summary of physical characterization of the samples

| <b>Samples</b> | <b>Yield</b><br>% | <b>SSA<sup>a</sup></b><br><b>m<sup>2</sup>g<sup>-1</sup></b> | <b>Vt<sup>b</sup></b><br><b>cm<sup>3</sup>g<sup>-1</sup></b> | <b>Vm<sup>c</sup></b><br><b>cm<sup>3</sup>g<sup>-1</sup></b> | <b>d<sub>002</sub><sup>d</sup></b><br><b>nm</b> | <b>I<sub>D</sub>/I<sub>G</sub><sup>e</sup></b> |
|----------------|-------------------|--------------------------------------------------------------|--------------------------------------------------------------|--------------------------------------------------------------|-------------------------------------------------|------------------------------------------------|
| CMPC-3         | 21.5              | 900.1                                                        | 1.242                                                        | 0.675                                                        | 0.349                                           | 1.233                                          |
| CMPC-2         | 22.7              | 903.0                                                        | 1.090                                                        | 0.343                                                        | 0.354                                           | 1.28                                           |
| CMPC-1         | 19.2              | 908.4                                                        | 1.026                                                        | 0.412                                                        | 0.356                                           | 1.18                                           |
| MPC            | 14.1              | 39.8                                                         | 0.081                                                        | 0.013                                                        | -                                               | 0.87                                           |

<sup>a</sup> BET specific surface area

<sup>b</sup> adsorption total pore volume from at a relative pressure P/P<sub>0</sub>=0.99

<sup>c</sup> micropore volume (pore size < 2nm) from t-Plot analysis

<sup>d</sup> interlayer distance of (002) plane calculated based on Bragg equation from XRD patterns

<sup>e</sup> the intense ratio of D band and G band from Raman spectra
