# Supplementary figures and images for: Coralloid carbon material based on biomass as a promising anode material for lithium and sodium storage
Source: Royal Society of Chemistry journal article supplement (doi:10.1039/d0nj01769h), 2021-01-01

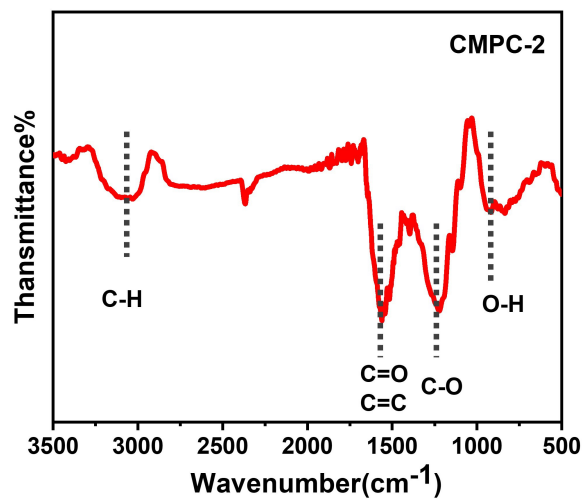

Supplement: d0nj01769h2.pdf [file d0nj01769h2.pdf]

**Magnolia petals**

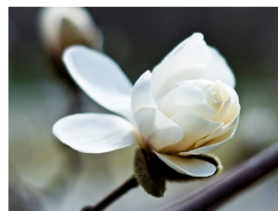

**ZnCl<sub>2</sub>**

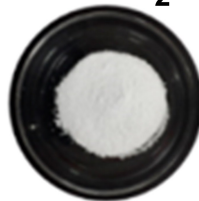

**Carbonization**

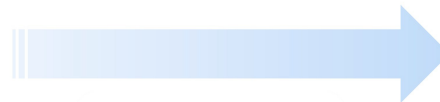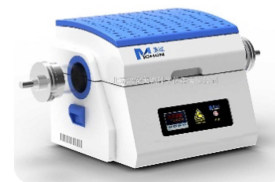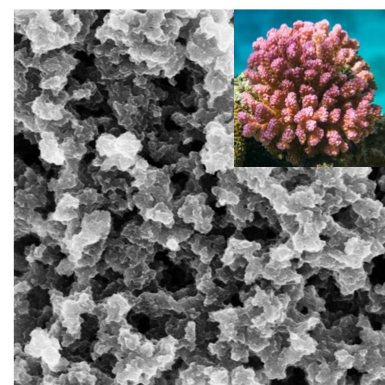

**Coralloid-MPCs**

Supplement: d0nj01769h5.pdf [file d0nj01769h5.pdf]
